# Supplementary material for: High Prevalence of Vitamin D deficiency among normotensive and hypertensive pregnant women in Ghana
Source: Research Square preprint supplement (doi:10.21203/rs.3.rs-174322/v1), 2021-02-08
Supplement: Supplementary file 1 [file a29db21a4b1abb87ff5c47be.docx]

**High Prevalence of Vitamin D deficiency among normotensive and hypertensive pregnant women in Ghana**

Linda Ahenkorah Fondjo1* Worlanyo Tashie1,William K. B. A. Owiredu1, Enoch Appiah Adu-Gyamfi2, Laila Seidu3

*1Department of Molecular Medicine, SMD, KNUST Ghana,2Department of Physiology, University of Cape Coast, Ghana, 3Comboni Hospital, Ho, Volta Region.*

**Corresponding Author*

[*linda.ahenkorahfondjo@yahoo.com*](mailto:linda.ahenkorahfondjo@yahoo.com)

*Department of Molecular Medicine, KNUST-Ghana*

*0000-0003-0252-3190*

**Smoothed percentiles of estimated birth weight (grams) for gestational age**


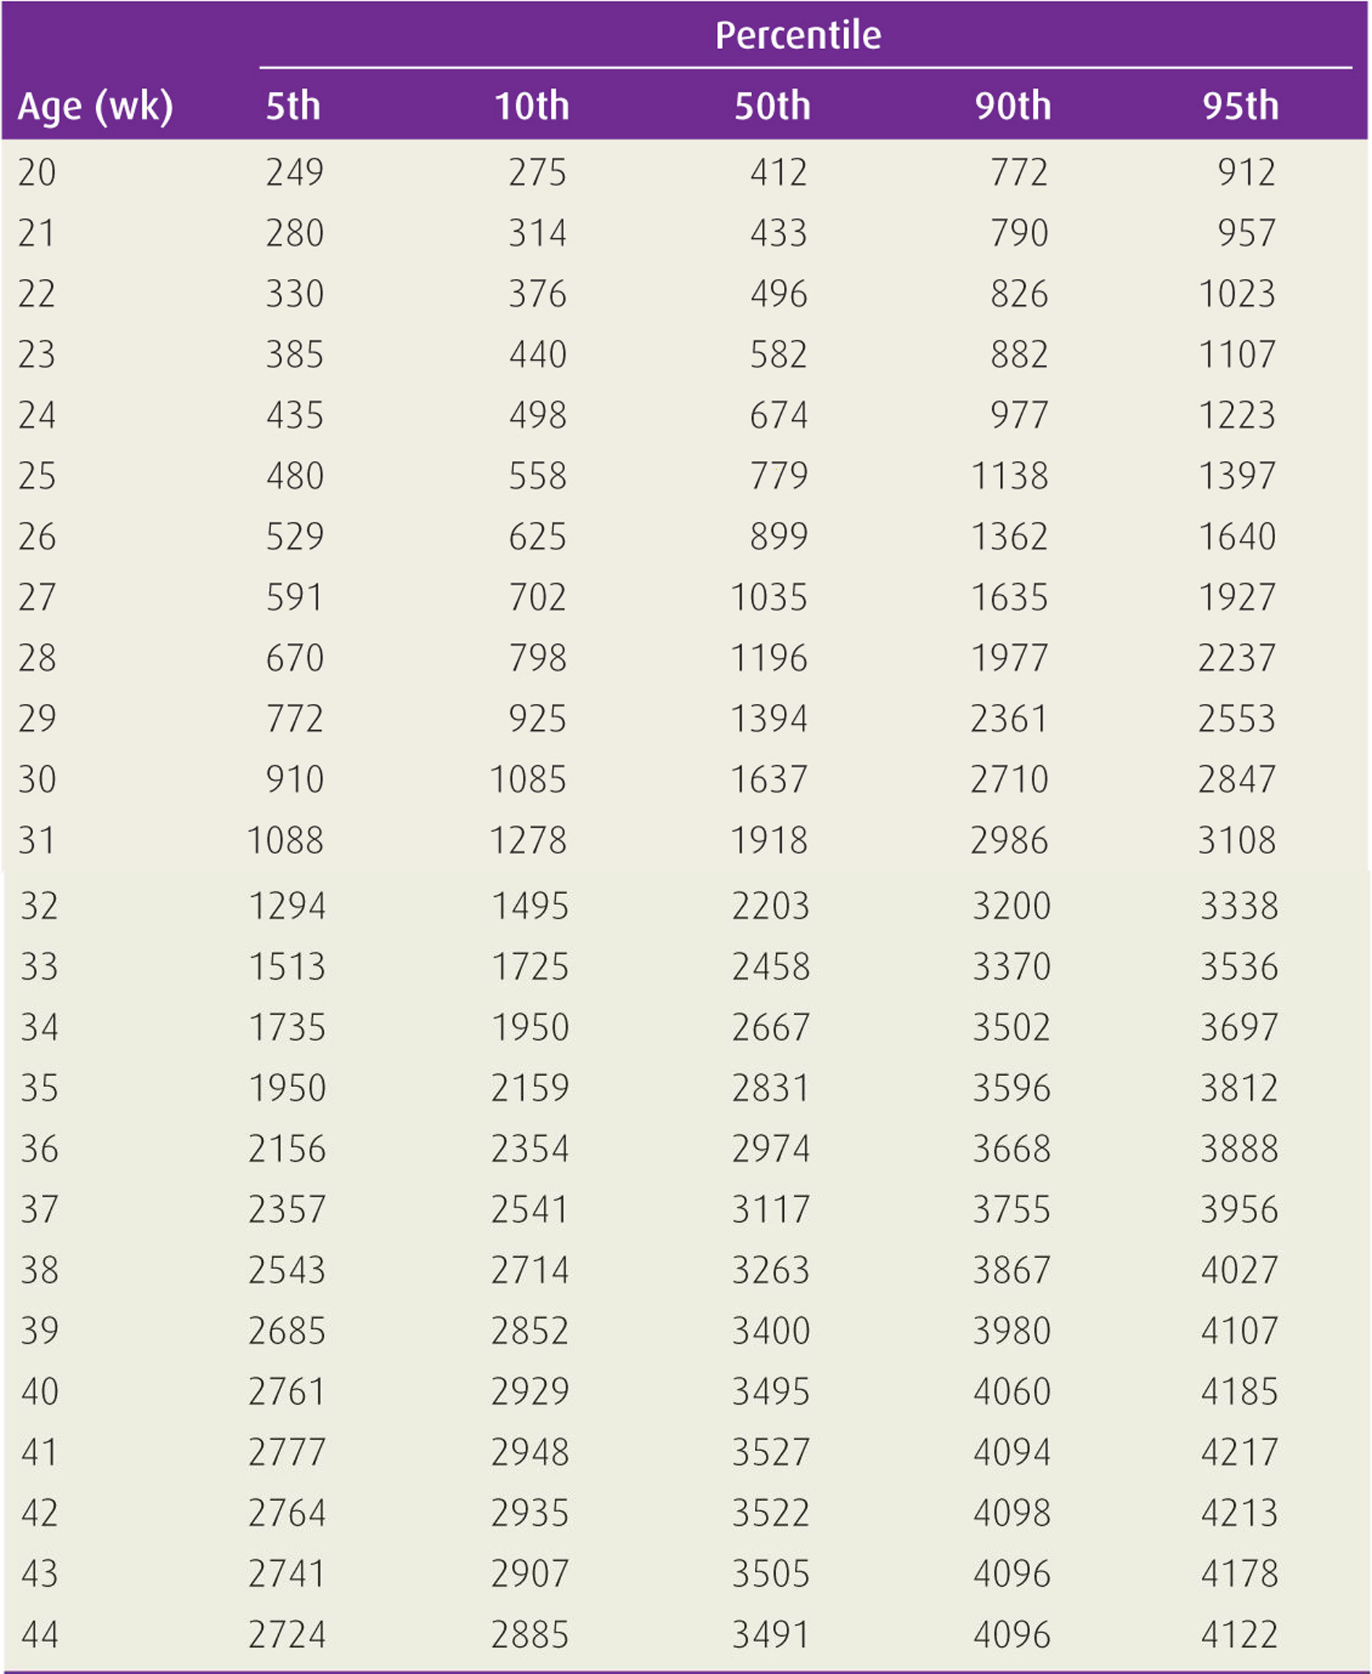


***Source***: Alexander GR, Himes JH, Kaufman RB, Mor J, Kogan M. A United States national reference for fetal growth. Obstetrics and gynecology. 1996;87(2):163-8 ([49](#_ENREF_49)).
